# Supplementary material for: The Mediator CDK8-Cyclin C complex modulates Dpp signaling in Drosophila by stimulating Mad-dependent transcription
Source: PLoS Genet. 2020 May 28;16(5):e1008832. doi: 10.1371/journal.pgen.1008832 (PMC7282676; doi:10.1371/journal.pgen.1008832)
Supplement: S1 Table — (XLSX) [file pgen.1008832.s011.xlsx]

## Sheet: S1 Table
Table S1. Results of 490 deficiency (Df) lines tested for potential dominant modification of vein phenotypes caused by altered levels of CDK8 or CycC.
Stock #	Deficiency lines	Cytogenetic breakpoints	nub>CDK8+ backrgound	nub>CDK8-RNAi background	nub>CycC-RNAi background
27887	Df(1)BSC843	1A1;1A3	NE	NE	NE
901	Df(1)svr	1A1;1B9--10	weak suppressor	strong enhancer	enhancer
25058	Df(1)BSC530	1A5;1B12	NE	NE	lethal
3370	Df(1)su(s)83	1B10;1D6--E1	lethal	lethal	NE
9053	Df(1)ED6443	1B14;1E1	NE	NE	NE
26571	Df(1)BSC719	2A3;2B13	NE	NE	NE
26569	Df(1)BSC717	2F2;3A4	NE	NE	NE
8031	Df(1)ED411	3A3;3A8	NE	enhancer	enhancer
9348	Df(1)ED6584	3A8;3B1	NE	NE	NE
8948	Df(1)ED6630	3B1;3C5	NE	NE	NE
27886	Df(1)BSC834	3C11;3F3	enhancer	NE	weak suppressor
25059	Df(1)BSC531	3C3;3E2	enhancer	strong suppressor	strong suppressor
9169	Df(1)ED6712	3D3;3F1	enhancer	NE	NE
24145	Df(1)ED6716	3F3;4B4	NE	NE	NE
25414	Df(1)BSC580	4A5;4C13	NE	NE	NE
8956	Df(1)ED6727	4B6;4D5	NE	NE	NE
944	Df(1)JC70	4C15--16;5A1--2	NE	NE	NE
7708	Df(1)Exel6234	4F10;5A2	NE	suppressor	NE
25061	Df(1)BSC533	4F4;4F10	NE	NE	NE
8949	Df(1)ED6802	5A12;5D1	NE	NE	NE
7709	Df(1)Exel6235	5A2;5A6	enhancer	NE	NE
25114	Df(1)BSC571	5A4;5A10	NE	NE	NE
5281	Df(1)dx81	5C3--10;6C3--12	lethal	lethal	lethal
8947	Df(1)ED6829	5C7;5F3	suppressor	NE	NE
7713	Df(1)Exel6239	5F2;6B1--2	NE	NE	NE
7714	Df(1)Exel6240	6B2;6C4	NE	NE	NE
24375	Df(1)BSC351	6C11;6D7	NE	NE	NE
25063	Df(1)BSC535	6C2;6C8	enhancer	NE	NE
3196	Df(1)Sxl-bt	6E2;7A6	suppressor	strong enhancer	strong enhancer
8955	Df(1)ED6906	7A3;7B2	NE	weak enhancer	NE
25064	Df(1)BSC536	7B2;7C1	NE	suppressor	suppressor
6698	Df(1)hl-a	7B7;7E2	weak suppressor	NE	NE
25697	Df(1)BSC622	7C2;7D1	NE	NE	NE
949	Df(1)C128	7D1;7D5--6	enhancer	NE	strong enhancer
26514	Df(1)BSC662	7D6;7F1	NE	NE	suppressor
8033	Df(1)ED6957	8B6;8C13	NE	NE	enhancer
25065	Df(1)BSC537	8C4;8E4	NE	NE	NE
26564	Df(1)BSC712	8F1;9B1	suppressor	suppressor	suppressor
27586	Df(1)BSC825	7E1;8C4	NE	enhancer	NE
9153	Df(1)ED7005	9B1;9D3	NE	NE	NE
26853	Df(1)BSC755	9C4;9F5	NE	NE	NE
25068	Df(1)BSC540	9E8;10A3	NE	NE	suppressor
903	Df(1)v-L3	9F10;10A7--8	NE	NE	NE
6219	Df(1)v-L1	9F13;10A5	NE	enhancer	enhancer
25391	Df(1)BSC572	9F8;10A3	NE	NE	NE
23672	Df(1)BSC287	10A10;10B11	NE	NE	NE
26574	Df(1)BSC722	10B3;10E1	NE	NE	NE
9171	Df(1)ED7147	10D6;11A1	NE	NE	NE
9217	Df(1)ED7161	11A1;11B14	NE	NE	NE
8898	Df(1)ED7170	11B15;11E8	NE	NE	NE
26864	Df(1)BSC767	11E8;12A7	NE	enhancer	enhancer
8952	Df(1)ED7217	12A9;12C6	suppressor	NE	NE
24146	Df(1)ED7225	12C4;12E8	NE	NE	NE
9352	Df(1)ED7229	12E5;12F2	NE	NE	NE
9218	Df(1)ED7261	12F2;12F5	enhancer	NE	NE
24336	Df(1)BSC310	12F5;13A10	NE	NE	NE
8035	Df(1)ED7294	13B1;13C3	NE	NE	NE
9219	Df(1)ED7331	13C3;13F1	NE	NE	NE
26566	Df(1)BSC714	13E14;14A8	NE	NE	suppressor
26855	Df(1)BSC758	14A6;14C1	NE	suppressor	suppressor
26869	Df(1)BSC772	14B9;14C4	lethal	strong suppressor	strong enhancer
23295	Df(1)FDD-0024486	14C4;14D1	NE	suppressor	NE
26858	Df(1)BSC761	14D1;14F1	NE	NE	NE
26857	Df(1)BSC760	14E1;14F2	NE	NE	NE
1158	Df(1)rif	15A1--2;15A4--5	NE	NE	NE
25416	Df(1)BSC582	15A1;15E2	NE	NE	NE
8954	Df(1)ED7374	15A1;15E3	suppressor	NE	NE
25417	Df(1)BSC583	15F1;16B10	NE	NE	NE
25733	Df(1)BSC643	15F9;16F1	NE	NE	NE
24429	Df(1)BSC405	16D5;16F6	NE	NE	pupa lethal
24376	Df(1)BSC352	16F7;17A8	NE	NE	suppressor
26568	Df(1)BSC716	17A3;17D6	NE	NE	NE
9350	Df(1)ED7424	17D1;18C1	NE	suppressor	NE
7768	Df(1)Exel7468	18B7;18C8	NE	NE	NE
23171	Df(1)BSC275	18C8;18D3	NE	NE	NE
9059	Df(1)ED7620	18D10;19A2	NE	NE	enhancer
25420	Df(1)BSC586	18F2;19D1	NE	NE	NE
25734	Df(1)BSC644	19C1;19E7	NE	NE	NE
26560	Df(1)BSC708	19E7;20A4	NE	NE	NE
7723	Df(1)Exel6255	20A1;20C1	NE	NE	NE
27585	Df(1)BSC824	20C1;20F3	NE	NE	NE
977	Df(1)DCB1-35b	19F1--2;20E--F	NE	weak suppressor	weak suppressor
4959	Df(2L)C'	h35;h38L	NE	NE	NE
24626	Df(2L)ED50001	21A1;21B1	NE	NE	NE
9353	Df(2L)ED5878	21B1;21B3	NE	weak enhancer	enhancer
8901	Df(2L)ED19	21B3;21B7	NE	strong enhancer	enhancer
24958	Df(2L)BSC454	21B7;21B8	suppressor	weak suppressor	NE
8672	Df(2L)BSC106	21B7;21C2	NE	NE	NE or weak enhancer
3548	Df(2L)al	21B8--C1;21C8--D1	NE	enhancer	weak suppressor
8673	Df(2L)BSC107	21C2;21E2	NE	strong enhancer	enhancer
3084	Df(2L)ast2	21D1--2;22B2--3	weak enhancer	NE	weak suppressor
8908	Df(2L)ED94	21E2;21E3	NE	NE	NE
24118	Df(2L)ED105	21E2;22A1	NE	suppressor	strong suppressor
7492	Df(2L)Exel6005	22A3;22B1	NE	weak enhancer	weak enhancer
26540	Df(2L)BSC688	22B1;22D6	NE	NE	NE
24959	Df(2L)BSC455	22D5;22E1	NE	NE	NE
9176	Df(2L)ED136	22F4;23A3	NE	NE	NE
7744	Df(2L)Exel6277	23A2;23B1	enhancer	NE	NE
1581	Df(2L)JS31	23A3--4;23D	strong suppressor	enhancer	enhancer
26544	Df(2L)BSC692	23B3;23B7	NE	NE	NE
9610	Df(2L)BSC180	23B7;23C3	NE	NE	NE
8904	Df(2L)ED4651	23B8;23F3	NE	NE	NE
6507	Df(2L)drm-P2	23F3--4;24A1--2	NE	NE	NE
23677	Df(2L)BSC292	23F6;24A2	NE	NE	NE
24123	Df(2L)ED247	24A2;24C3	NE	NE	NE
5330	Df(2L)ed1	24A2;24D4	NE	NE	strong suppressor
7495	Df(2L)Exel6009	24C3;24C8	NE	NE	enhancer
7790	Df(2L)Exel8010	24C8;24D4	suppressor	weak enhancer	NE
9600	Df(2L)BSC165	24D4;24D8	NE	NE	NE
23680	Df(2L)BSC295	24D4;24F3	strong suppressor	enhancer	NE
744	Df(2L)M24F-B	24E1--2;24F6--7	NE	NE	NE
9270	Df(2L)ED250	24F4;25A7	NE	NE	NE
24124	Df(2L)ED7853	25A3;25B10	NE	NE	NE
1164	Df(2L)tkv3	25A4--5;25D5	weak enhancer	strong enhancer	strong enhancer
9605	Df(2L)BSC172	25B10;25C1	NE	NE	NE
8835	Df(2L)BSC110	25C1;25C4	NE	NE	NE
8674	Df(2L)BSC109	25C4;25C8	NE	NE	NE
7497	Df(2L)Exel6011	25C8;25D5	lethal	enhancer	NE or weak suppressor
7498	Df(2L)Exel6012	25D5;25E6	NE	strong suppressor	suppressor
9560	Df(2L)BSC169	25E5;25F3	weak enhancer	NE	enhancer
9343	Df(2L)ED334	25F2;26B2	NE	NE	NE
9341	Df(2L)ED385	26B1;26D7	NE	NE	NE
6338	Df(2L)BSC6	26D3--E1;26F4--7	NE	NE	NE
24378	Df(2L)BSC354	26D7;26E3	enhancer	NE	NE
9615	Df(2L)BSC188	26F1;27A2	NE	NE	NE
24126	Df(2L)ED441	27A1;27E1	strong suppressor	NE	NE
23676	Df(2L)BSC291	27D6;27F2	NE	NE	NE
9060	Df(2L)ED489	27E4;28B1	NE	NE	NE
9708	Df(2L)BSC233	27F3;28D2	NE	NE	NE
9502	Df(2L)BSC142	28C3;28D3	NE	NE	NE
7807	Df(2L)Exel7034	28E1;28F1	NE	NE	NE
9704	Df(2L)BSC227	28E8;29B1	NE	weak suppressor	suppressor
8836	Df(2L)BSC111	28F5;29B1	NE	NE	suppressor
24132	Df(2L)ED629	29B4;29E4	strong enhancer	NE	NE or weak enhancer
9631	Df(2L)BSC204	29D5;29F8	NE	NE	NE
8906	Df(2L)ED678	29F5;30B12	NE	NE	NE
24133	Df(2L)ED690	30B3;30E4	NE	NE	NE
6478	Df(2L)BSC17	30C3--5;30F1	weak suppressor	NE	lethal
9715	Df(2L)BSC240	30C7;30F2	NE	NE	NE
8469	Df(2L)BSC50	30F4--5;31B1--4	NE	NE	NE
26541	Df(2L)BSC689	30F5;31B1	NE	NE	NE
9503	Df(2L)BSC143	31B1;31D9	suppressor	NE	NE
1469	Df(2L)J39	31C--D;32D--E	NE	NE	NE
9635	Df(2L)BSC208	31D7;31D11	NE	NE	NE
9637	Df(2L)BSC209	31D7;31E1	NE	NE	NE
24135	Df(2L)ED8142	31E1;32A4	NE	NE	weak enhancer
9642	Df(2L)BSC214	31F5;32B4	NE	NE	NE
9641	Df(2L)BSC213	32B1;32C1	NE	NE	NE or weak suppressor
9505	Df(2L)BSC145	32C1;32C1	NE	NE	NE
9716	Df(2L)BSC241	32C1;32F2	suppressor	NE	NE
9718	Df(2L)BSC244	32F2;33B6	enhancer	strong suppressor	strong suppressor
7512	Df(2L)Exel6030	33A2--33B3	suppressor	enhancer	enhancer
24109	Df(2L)ED761	33A2;33E5	NE	weak suppressor	suppressor
8907	Df(2L)ED775	33B8;34A3	NE	NE	NE
23662	Df(2L)BSC277	34A1;34B2	NE	NE	weak enhancer
6999	Df(2L)BSC30	34A3;34B7--9	weak enhancer	NE	NE
26865	Df(2L)BSC768	34A9;34B8	lethal	lethal	lethal
27383	Df(2L)BSC812	34B11;34E1	NE	NE	suppressor
9594	Df(2L)BSC159	34B4;34C4	strong suppressor	NE	suppressor
23152	Df(2L)BSC252	34D1;34F1	enhancer	NE	NE
9061	Df(2L)ED793	34E4;35B4	NE	weak enhancer	weak enhancer
6963	Df(2L)ED3	35B2;35D1	NE	NE	NE
8946	Df(2L)ED1050	35B8;35D4	NE	NE	NE or weak suppressor
1491	Df(2L)r10	35D1;36A6--7	weak enhancer	NE	NE or weak enhancer
26542	Df(2L)BSC690	35D4;35D4	NE	NE	NE
7521	Df(2L)Exel6038	35D6;35E2	NE	suppressor	suppressor
23663	Df(2L)BSC278	35E1;35F1	NE	NE	NE
27353	Df(2L)BSC781	35F1;36A1	NE	enhancer	strong enhancer
24113	Df(2L)ED1102	35F12;36A10	NE	NE	NE
24114	Df(2L)ED1161	36A10;36C9	NE	NE	NE
3180	Df(2L)H20	36A8--9;36E1--2	NE	enhancer	enhancer
9507	Df(2L)BSC148	36C8;36E3	NE	NE	NE
7839	Df(2L)Exel7070	36E2;36E6	suppressor	NE	NE
23156	Df(2L)BSC256	36E3;36F2	NE	NE	NE
7840	Df(2L)Exel8038	36E5;36F5	enhancer	enhancer	enhancer
9508	Df(2L)BSC149	36F5;36F10	NE	NE	NE
8935	Df(2L)ED1203	36F7;37C5	NE	NE	NE
24116	Df(2L)ED1272	37C5;38A2	NE	NE	weak enhancer
8679	Df(2L)ED1303	37E5;38C6	NE	NE	NE
167	Df(2L)TW161	38A6--B1;40A4--B1	NE	NE	NE
9269	Df(2L)ED1315	38B4;38F5	NE	NE	NE
9682	Df(2L)ED1378	38F1;39D2	NE	NE	NE
9266	Df(2L)ED1473	39B4;40A5	NE	weak suppressor	NE
9510	Df(2L)BSC151	40A5;40E5	NE	NE	suppressor
741	Df(2R)M41A10	41A;41A	NE	weak enhancer	NE
25705	Df(2R)BSC630	41D3;41F11	NE	NE	NE
749	In(2R)bw[VDe2L]Cy[R]	42A2;42A3	NE	suppressor	enhancer
8045	Df(2R)ED1612	42A13;42E6	NE	enhancer	NE
9683	Df(2R)ED1484	42A2;42A14	weak suppressor	NE	NE
9062	Df(2R)ED1673	42E1;43D3	NE	NE	NE
8931	Df(2R)ED1715	43A4;43F1	NE	NE	NE
8941	Df(2R)ED1725	43E4;44B5	weak enhancer	strong enhancer	NE
24335	Df(2R)BSC267	44A4;44C4	weak enhancer	NE	NE or weak suppressor
9157	Df(2R)ED1770	44D5;45B4	enhancer	strong enhancer	enhancer
9063	Df(2R)ED1791	44F7;45F1	NE	NE	NE
23665	Df(2R)BSC280	45C4;45F4	NE	NE	strong enhancer
9410	Df(2R)BSC132	45F6;46B4	NE	NE	enhancer
23682	Df(2R)BSC298	46B2;46C7	NE	weak enhancer	NE
1702	Df(2R)X1	46C;47A1	suppressor	NE	NE
9539	Df(2R)BSC152	46C1;46D6	NE	NE	NE
23686	Df(2R)BSC303	46E1;46F3	NE	NE	NE
23666	Df(2R)BSC281	46F1;47A9	NE	NE	NE
25428	Df(2R)BSC595	47A3;47F1	suppressor	weak suppressor	NE
8910	Df(2R)ED2219	47D6;48B6	weak enhancer	NE	NE
8912	Df(2R)ED2247	48A3;48D5	NE	strong enhancer	enhancer
9626	Df(2R)BSC199	48C5;48E4	enhancer	NE	NE
26551	Df(2R)BSC699	48D7;48E6	NE	NE	NE
24929	Df(2R)BSC425	48F1;49A1	NE	NE	NE
7543	Df(2R)Exel6061	48F1;49A6	enhancer	NE	NE
1642	Df(2R)vg135	49A;49E1--2	NE	NE	NE
23688	Df(2R)BSC305	49A4;49A10	NE	NE	NE
24989	Df(2R)BSC485	49B10;49E6	suppressor	strong suppressor	strong suppressor
7869	Df(2R)Exel7121	49B5;49B12	weak suppressor	NE	NE
442	Df(2R)CX1	49C1--4;50C23--D2	strong suppressor	strong suppressor	strong suppressor
7544	Df(2R)Exel6062	49E6;49F1	NE	NE	NE or weak enhancer
7871	Df(2R)Exel8057	49F1;49F10	suppressor	NE	NE
23169	Df(2R)BSC273	49F4;50A13	NE	NE	suppressor
23170	Df(2R)BSC274	50A7;50B4	NE	NE	NE
23690	Df(2R)BSC307	50B6;50C18	NE	suppressor	suppressor
24385	Df(2R)BSC361	50C3;50F1	NE	NE	NE
24407	Df(2R)BSC383	50C6;50D2	NE	suppressor	suppressor
7875	Df(2R)Exel7130	50D4;50E4	NE	NE	NE
7876	Df(2R)Exel7131	50E4;50F6	NE	NE	NE
8913	Df(2R)ED2354	50E6;51B1	NE	suppressor	NE
7749	Df(2R)Exel6284	51B1;51C2	NE	NE	enhancer
24933	Df(2R)BSC429	51C2;51D1	NE	NE	weak enhancer
25741	Df(2R)BSC651	51C5;51E2	NE	NE	NE
9064	Df(2R)ED2426	51E2;52B1	NE	NE	NE
8914	Df(2R)ED2436	51F11;52D11	NE	NE	NE
8915	Df(2R)ED2457	52D11;52E7	lethal	NE	weak enhancer
7885	Df(2R)Exel9060	52E11;52F1	strong suppressor	NE	NE
3521	Df(2R)Jp6	52E3--5;52F	NE	NE	NE
7545	Df(2R)Exel6063	52F6;53C4	suppressor	suppressor	NE
25078	Df(2R)BSC550	53C1;53C6	NE	NE	NE or weak suppressor
7546	Df(2R)Exel6064	53C11;53D11	strong enhancer	suppressor	strong suppressor
7888	Df(2R)Exel7144	53C8;53D2	weak suppressor	NE	NE
9278	Df(2R)ED2747	53D11;53F8	NE	NE	NE
24356	Df(2R)BSC331	53D14;54A1	NE	NE	NE
7548	Df(2R)Exel6066	53F8;54B6	enhancer	NE	NE
24379	Df(2R)BSC355	54B16;54C3	NE	NE	NE
9596	Df(2R)BSC161	54B2;54B17	NE	NE	NE
7890	Df(2R)Exel7149	54C10;54D5	weak suppressor	NE	NE
24371	Df(2R)BSC347	54D2;54E9	NE	NE	NE
6780	Df(2R)14H10W-35	54E5--7;55B5--7	enhancer	strong enhancer	strong enhancer
9066	Df(2R)ED3610	54F1;55C8	NE	NE	suppressor
8918	Df(2R)ED3683	55C2;56C4	NE	NE	NE
7551	Df(2R)Exel6069	56B5;56C11	suppressor	NE	suppressor
9423	Df(2R)BSC135	56C11;56D5	NE	NE	NE
9067	Df(2R)ED3728	56D10;56E2	NE	NE	NE
6647	Df(2R)BSC22	56D7--E3;56F9--12	NE	NE	NE
27354	Df(2R)BSC782	56D8;56D14	NE	NE	NE
25678	Df(2R)BSC594	56E1;56F9	NE	suppressor	suppressor
7896	Df(2R)Exel7162	56F11;56F16	NE	enhancer	enhancer
6609	Df(2R)BSC19	56F12--14;57A4	weak suppressor	NE	weak suppressor
26553	Df(2R)BSC701	56F15;57A9	NE	NE	NE
26554	Df(2R)BSC702	57A2;57B3	NE	NE	NE
9267	Df(2R)ED3791	57B1;57D4	NE	NE	NE
3469	Df(2R)PK1	57C5;57F5--6	weak enhancer	enhancer	strong enhancer
27582	Df(2R)BSC821	57D10;57E6	NE	NE	enhancer
26516	Df(2R)BSC664	57D12;58A3	NE	suppressor	NE
25430	Df(2R)BSC597	58A2;58F1	suppressor	strong enhancer	enhancer
7903	Df(2R)Exel7173	58D4;58E5	NE	strong enhancer	enhancer
25431	Df(2R)BSC598	58F3;59A1	NE	NE	weak suppressor
27359	Df(2R)BSC787	58F4;59B1	NE	NE	NE
3909	Df(2R)59AD	59A1--3;59D1--4	NE	strong enhancer	strong enhancer
25432	Df(2R)BSC599	59B1;59B3	NE	suppressor	suppressor
27356	Df(2R)BSC784	59B4;59B6	NE	enhancer	enhancer
26866	Df(2R)BSC769	59B7;59D9	NE	NE	NE or weak suppressor
26513	Df(2R)BSC661	59D8;59F5	weak suppressor	NE	NE
9424	Df(2R)BSC136	59F5;60B6	suppressor	suppressor	strong suppressor
24380	Df(2R)BSC356	60B8;60C4	NE	strong enhancer	NE
27352	Df(2R)BSC780	60C2;60D14	strong suppressor	strong enhancer	strong enhancer
7561	Df(2R)Exel6082	60C4--60C7	suppressor	enhancer	enhancer
25436	Df(2R)BSC603	60C7--60D1	strong suppressor	enhancer	enhancer
25437	Df(2R)BSC604	60D4;60E11	NE	NE	suppressor
25441	Df(2R)BSC608	60E11;60F2	NE	NE	NE
2471	Df(2R)M60E	60E2--3;60E11--12	weak suppressor	NE	enhancer
2528	Df(2R)gsb	60E9--10;60F1--2	NE	NE	NE
4961	Df(2R)Kr10	60F1;60F5	NE	lethal	NE
24758	Df(2R)ED50004	60F5;60F5	NE	suppressor	suppressor
24627	Df(3L)ED50002	61A1;61B1	NE	NE or suppressor	NE
8047	Df(3L)ED201	61B1;61C1	NE	NE	NE
24386	Df(3L)BSC362	61C1;61C7	NE	suppressor	NE
8049	Df(3L)ED4191	61C3;62A2	NE	NE	NE
23674	Df(3L)BSC289	61F6;62A9	enhancer	NE	NE or weak suppressor
9693	Df(3L)BSC181	62A11;62B7	strong enhancer	NE	NE or weak suppressor
27372	Df(3L)BSC800	62A9;62A9	NE	NE	NE
5411	Df(3L)Aprt-32	62B1;62E3	strong enhancer	NE	enhancer
8096	Df(3L)ED4287	62B4;62E5	strong enhancer	NE	NE
8976	Df(3L)BSC119	62E7;62F5	NE	enhancer	weak enhancer
6755	Df(3L)BSC23	62E8;63B5--6	NE	NE	NE
3650	Df(3L)M21	62F;63D	strong suppressor	suppressor	suppressor
7571	Df(3L)Exel6092	62F5;63A3	NE	NE	NE
26523	Df(3L)BSC671	63A2;63B11	NE	NE	weak enhancer
26524	Df(3L)BSC672	63A7;63B12	weak suppressor	NE or weak enhancer	NE
8058	Df(3L)ED4293	63C1;63C1	NE	NE	NE
8059	Df(3L)ED208	63C1;63F5	NE	NE	NE
7573	Df(3L)Exel6094	63D2;63E1	NE	enhancer	enhancer
7574	Df(3L)Exel6095	63E1;63E3	weak suppressor	suppressor	NE
24392	Df(3L)BSC368	63F1;64A4	NE	NE	NE
7577	Df(3L)Exel6098	63F2;63F7	weak suppressor	suppressor	NE
8060	Df(3L)ED4341	63F6;64B9	NE	NE	NE
8061	Df(3L)ED210	64B9;64C13	NE	NE	NE
3096	Df(3L)ZN47	64C;65C	strong enhancer	NE	NE
24395	Df(3L)BSC371	64C1;64E1	suppressor	NE or weak suppressor	NE
7585	Df(3L)Exel6106	64D6;64E2	NE	NE	enhancer
7586	Df(3L)Exel6107	64E5;64F5	NE	NE	NE
24914	Df(3L)BSC410	64E7;65B3	NE	NE	NE
24915	Df(3L)BSC411	65A2;65C1	NE	NE	NE
7588	Df(3L)Exel6109	65C3;65D3	enhancer	NE	NE
6867	Df(3L)BSC27	65D4--5;65E4--6	NE	NE	NE
9701	Df(3L)BSC224	65D5;65E6	suppressor	NE	NE
6964	Df(3L)BSC33	65E10--F1;65F2--6	NE	NE	NE
8974	Df(3L)BSC117	65E9;65F5	suppressor	NE	suppressor
7929	Df(3L)Exel8104	65F7;66A4	NE	NE	NE
7745	Df(3L)Exel6279	66A17;66B5	weak enhancer	enhancer	NE
24399	Df(3L)BSC375	66A3;66A19	NE	weak enhancer	NE or weak enhancer
24412	Df(3L)BSC388	66A8;66B11	suppressor	NE	suppressor
7591	Df(3L)Exel6112	66B5;66C8	NE	NE	NE
24413	Df(3L)BSC389	66C12;66D8	suppressor	enhancer	enhancer
27576	Df(3L)BSC815	66C3;66D4	weak suppressor	NE	NE or weak enhancer
8066	Df(3L)ED4421	66D12;67B3	NE	weak suppressor	suppressor
27577	Df(3L)BSC816	66D9;66D12	weak suppressor	enhancer	strong enhancer
7079	Df(3L)BSC35	66F1--2;67B2--3	suppressor	suppressor	weak suppressor
997	Df(3L)AC1	67A2;67D11--13	strong enhancer	enhancer	enhancer
8970	Df(3L)BSC113	67B1;67B5	NE	NE	NE
8975	Df(3L)BSC118	67B11;67C5	NE	NE	suppressor
24415	Df(3L)BSC391	67B7;67C5	NE	enhancer	enhancer
24416	Df(3L)BSC392	67C4;67D1	suppressor	NE or weak enhancer	NE
26525	Df(3L)BSC673	67C7;67D10	suppressor	enhancer	weak enhancer
9355	Df(3L)ED4457	67E2;68A7	NE	NE	NE
8068	Df(3L)ED4470	68A6;68E1	NE	NE	NE
8069	Df(3L)ED4475	68C13;69B4	suppressor	NE	NE
26828	Df(3L)BSC730	68F7;69E6	weak suppressor	weak suppressor	NE
8072	Df(3L)ED4486	69C4;69F6	NE	suppressor	suppressor
6457	Df(3L)BSC12	69F6--70A1;70A1--2	NE	suppressor	weak suppressor
8097	Df(3L)ED4502	70A3;70C10	NE	NE	NE
8073	Df(3L)ED4543	70C6;70F4	NE	NE	NE
8074	Df(3L)ED217	70F4;71E1	NE	enhancer	enhancer
24946	Df(3L)BSC442	71D2;71E3	weak suppressor	NE	NE
27888	Df(3L)BSC845	71D3;72A1	suppressor	NE	NE
27346	Df(3L)BSC774	71F1;72D10	suppressor	NE	NE
24947	Df(3L)BSC443	72B1;72E4	suppressor	NE	pupal lethal
8078	Df(3L)ED4606	72D4;73C4	NE	NE	NE
8098	Df(3L)ED4674	73B5;73E5	strong enhancer	enhancer	enhancer
8099	Df(3L)ED4685	73D5;74E2	NE	NE	NE
8100	Df(3L)ED4710	74D1;75B11	NE	NE	weak suppressor
27347	Df(3L)BSC775	75A2;75E4	NE	NE	NE
9697	Df(3L)BSC220	75F1;76A1	weak suppressor	weak enhancer	NE
8087	Df(3L)ED229	76A1;76E1	strong suppressor	suppressor	NE
6646	Df(3L)BSC20	76A7--B1;76B4--5	suppressor	NE	suppressor
7943	Df(3L)Exel9008	76B3--4;76B9	NE	strong suppressor	NE
7944	Df(3L)Exel9009	76B5;76B9	suppressor	suppressor	NE
7945	Df(3L)Exel9011	76B8;76B9	suppressor	weak enhancer	enhancer
8088	Df(3L)ED4858	76D3;77C1	NE	NE	weak enhancer
27369	Df(3L)BSC797	77C3;78A1	NE	NE	NE
24953	Df(3L)BSC449	77F2;78C2	weak suppressor	NE	NE
25116	Df(3L)BSC553	78A2;78C2	suppressor	NE	weak suppressor
24923	Df(3L)BSC419	78C2;78D8	NE	enhancer	enhancer
8101	Df(3L)ED4978	78D5;79A2	NE	NE	NE
9700	Df(3L)BSC223	79A3;79B3	suppressor	NE	NE
24955	Df(3L)BSC451	79B2;79F5	NE	NE	NE
8089	Df(3L)ED230	79C2;80A4	NE	NE	enhancer
7617	Df(3L)Exel6138	79D3;79E3	NE	enhancer	NE
8102	Df(3L)ED5017	80A4;80C2	NE	NE	NE
7002	Df(3L)1-16	80F;80F	enhancer	NE	suppressor
9226	Df(3R)ED5100	81F6;82E7	NE	weak suppressor	NE
2596	Df(3L)6B-29+Df(3R)6B-29	81Fa;81Fa	suppressor	enhancer	enhancer
2597	Df(3R)10-65	81Fa;81Fa	suppressor	NE	NE
8967	Df(3R)ED5147	82E7;83A1	NE	enhancer	NE
8965	Df(3R)ED5156	82F8;83A4	NE	NE	NE
7623	Df(3R)Exel6144	83A6-83A6	strong suppressor	enhancer	enhancer
25077	Df(3R)BSC549	83A6;83B6	NE	enhancer	strong enhancer
8103	Df(3R)ED5177	83B4;83B6	NE	enhancer	enhancer
7443	Df(3R)BSC47	83B7--C1;83C6--D1	suppressor	NE	NE
7952	Df(3R)Exel7283	83B7;83C2	suppressor	weak enhancer	NE
24968	Df(3R)BSC464	83B7;83E1	NE	NE	NE
1990	Df(3R)Tpl10	83C1--2;84B1--2	enhancer	NE	weak suppressor
7624	Df(3R)Exel6145	83C1;83C4	strong enhancer	suppressor	enhancer
26533	Df(3R)BSC681	83E2;83E5	NE	NE	NE
26836	Df(3R)BSC738	83E5;84A1	weak suppressor	NE	enhancer
24971	Df(3R)BSC467	83F1;84B2	suppressor	NE	NE
1842	Df(3R)Antp17	84A5;84D9	NE	NE	NE
25724	Df(3R)BSC633	84B2;84C3	NE	NE	weak suppressor
8685	Df(3R)ED7665	84B4;84E11	NE	NE	NE
24970	Df(3R)BSC466	84E1;85A10	strong enhancer	enhancer	NE or weak enhancer
9077	Df(3R)ED5330	85A5;85D1	weak enhancer	strong enhancer	strong enhancer
7631	Df(3R)Exel6152	85C11;85D2	suppressor	NE	NE
9204	Df(3R)ED5339	85D1;85D11	NE	weak suppressor	NE
24980	Df(3R)BSC476	85D16;85D24	NE	NE	NE
7731	Df(3R)Exel6264	85D24;85E5	enhancer	NE	NE
25011	Df(3R)BSC507	85D6;85D15	NE	NE	suppressor
9078	Df(3R)ED5438	85E5;85F8	weak enhancer	NE	NE
7633	Df(3R)Exel6154	85E9;85F1	weak suppressor	enhancer	NE
7634	Df(3R)Exel6155	85F1;85F10	NE	NE	NE
9082	Df(3R)ED5474	85F11;86B1	NE	suppressor	suppressor
9215	Df(3R)ED5495	85F16;86C7	enhancer	suppressor	suppressor
25696	Df(3R)BSC621	85F5;85F14	NE	NE	NE
7636	Df(3R)Exel6157	86B1;86B2--86B3	lethal	weak enhancer	NE
25126	Df(3R)BSC568	86C7;86D7	NE	NE	NE
8957	Df(3R)ED5514	86C7;86E11	strong enhancer	NE	NE
24973	Df(3R)BSC469	86D8;87A2	suppressor	NE	weak enhancer
7965	Df(3R)Exel7310	86E18;87A1	suppressor	strong enhancer	enhancer
8029	Df(3R)ED5577	86F9;87B13	NE	NE	weak enhancer
24990	Df(3R)BSC486	87B10;87E9	suppressor	NE	enhancer
7931	Df(3R)Exel7315	87B8;87B9	NE	enhancer	NE
7973	Df(3R)Exel8157	87D8;87D10	NE	strong suppressor	suppressor
8921	Df(3R)ED5623	87E3;88A4	NE	weak enhancer	NE
7649	Df(3R)Exel6170	87F10;87F14	strong enhancer	suppressor	enhancer
7976	Df(3R)Exel8159	88A4;88B1	suppressor	enhancer	enhancer
9090	Df(3R)ED5644	88A4;88C9	suppressor	weak enhancer	NE
7734	Df(3R)Exel6267	88B1;88C2	weak suppressor	weak enhancer	NE
23714	Df(3R)ED10555	88C9;88D8	NE	NE	NE
7742	Df(3R)Exel6275	88D1;88D7	NE	NE	NE
24137	Df(3R)ED5664	88D1;88E3	strong suppressor	NE	NE
9152	Df(3R)ED5705	88E12;89A5	NE	NE	NE
26848	Df(3R)BSC750	88E2;88E5	NE	enhancer	NE
26839	Df(3R)BSC741	88E8;88F1	suppressor	weak suppressor	NE
25019	Df(3R)BSC515	88F6;89A8	enhancer	enhancer	enhancer
7983	Df(3R)Exel7328	89A12;89B6	NE	NE	NE
26580	Df(3R)BSC728	89A8;89B2	suppressor	NE	NE
9482	Df(3R)ED10642	89B17;89D5	NE	weak suppressor	NE
7737	Df(3R)Exel6270	89B18;89D8	NE	NE	NE or weak enhancer
3678	Df(3R)sbd45	89B4;89B10	NE	NE	NE
1467	Df(3R)P115	89B7--8;89E7	suppressor	NE	NE
9481	Df(3R)ED10639	89B7;89B18	NE	suppressor	suppressor
3486	Df(3R)Ubx109	89D1--2;89E1--2	NE	NE	NE
7655	Df(3R)Exel6176	89E11;89F1	strong suppressor	weak enhancer	weak enhancer
8104	Df(3R)ED5780	89E11;90C1	NE	NE	weak enhancer
26846	Df(3R)BSC748	89E5;89E11	strong suppressor	enhancer	enhancer
27362	Df(3R)BSC790	90B6;90E2	NE	suppressor	suppressor
25740	Df(3R)BSC650	90C6;91A2	suppressor	NE	weak suppresor
7657	Df(3R)Exel6178	90F4;91A5	suppressor	enhancer	enhancer
9208	Df(3R)ED5815	90F4;91B8	weak suppressor	NE	NE
6962	Df(3R)ED2	91A5;91F1	NE	NE	enhancer
7659	Df(3R)Exel6180	91B5;91C5	NE	weak enhancer	strong enhancer
24139	Df(3R)ED5938	91D4;92A11	strong enhancer	NE	letahl
8964	Df(3R)ED6025	92A11;92E2	NE	NE	NE
25021	Df(3R)BSC517	92C1;92F13	NE	NE	NE
9501	Df(3R)BSC141	92F2;93A1	NE	suppressor	NE
7413	Df(3R)BSC43	92F7--93A1;93B3--6	NE	NE	NE
27580	Df(3R)BSC819	93A2;93B8	enhancer	NE	NE
7739	Df(3R)Exel6272	93A4;93B13	NE	NE	NE
9487	Df(3R)ED10845	93B9;93D4	NE	NE	NE
26529	Df(3R)BSC677	93D1;93F14	lethal	lethal	NE
8923	Df(3R)ED6085	93F14;94B5	enhancer	NE	weak suppressor
8684	Df(3R)ED6096	94B5;94E7	NE	NE	enhancer
25694	Df(3R)BSC619	94D10;94E13	NE	NE	NE
9497	Df(3R)BSC137	94F1;95A4	NE	NE	NE
24993	Df(3R)BSC489	94F3;95D1	NE	NE	NE
7675	Df(3R)Exel6196	95C12;95D8	NE	NE	NE
9347	Df(3R)ED6187	95D10;96A7	weak enhancer	weak enhancer	NE
7676	Df(3R)Exel6197	95D8;95E1	NE	enhancer	NE
9211	Df(3R)ED6220	96A7;96C3	NE	suppressor	weak suppressor
24965	Df(3R)BSC461	96B15;96D1	NE	NE	weak suppressor
7680	Df(3R)Exel6201	96C2;96C4	NE	NE	NE
27404	Df(3R)FDD-0317950	96C8;96D1	suppressor	NE	NE
7681	Df(3R)Exel6202	96D1;96D1	NE	NE	NE or weak enhancer
7682	Df(3R)Exel6203	96E2;96E6	weak enhancer	NE	NE
24909	Df(3R)BSC321	96E6;96E9	NE	NE	NE
9500	Df(3R)BSC140	96F1;96F10	NE	NE	NE
8105	Df(3R)ED6232	96F10;97D2	NE	NE	enhancer
9210	Df(3R)ED6255	97D2;97F1	weak suppressor	NE	NE
25001	Df(3R)BSC497	97E6;98B5	NE	NE	NE
25390	Df(3R)BSC567	98B6;98E5	NE	lethal	lethal
7688	Df(3R)Exel6210	98E1;98F5	weak suppressor	NE	NE
27378	Df(3R)BSC806	98F1;98F10	NE	NE	NE
25005	Df(3R)BSC501	98F10;99B9	NE	NE	NE
3547	Df(3R)L127	99B5--6;99F1	weak suppressor	enhancer	enhancer
25075	Df(3R)BSC547	99B5;99C2	NE	NE	NE
7691	Df(3R)Exel6213	99C5;99D1	NE	enhancer	enhancer
25695	Df(3R)BSC620	99C5;99D3	suppressor	NE	enhancer
2352	Df(3R)X3F	99D1--2;99E1	suppressor	enhancer	enhancer
25006	Df(3R)BSC502	99D3;99D8	NE	NE	NE
7692	Df(3R)Exel6214	99D5;99E2	NE	lethal	weak enhancer
2234	Df(3R)R133	99E1--5;3Rt	NE	NE	NE
25007	Df(3R)BSC503	99E3;99F6	enhancer	NE	NE
25008	Df(3R)BSC504	99F4;100A2	NE	NE	NE
7997	Df(3R)Exel7378	99F8;100A5	NE	NE	NE
2155	Df(3R)A113	100A;3Rt	suppressor	strong enhancer	enhancer
7918	Df(3R)Exel8194	100A4;100A7	suppressor	weak enhancer	enhancer
24142	Df(3R)ED6346	100A5;100B1	NE	NE	NE
26847	Df(3R)BSC749	100B1--100C1	suppressor	NE	enhancer
27365	Df(3R)BSC793	100B5;100C4	NE	NE	NE
24143	Df(3R)ED6361	100C7;100E3	NE	NE	NE
24516	Df(3R)ED50003	100E1;100F5	enhancer	NE	NE
9433	Df(4)M101-62f	101E;102B	NE	weak suppressor	NE
9421	Df(4)ED6364	101F1;102A6	NE	NE	NE
9422	Df(4)ED6369	102A1;102C1	NE	NE	NE
9579	Df(4)ED6380	102B7;102D5	NE	enhancer	NE
	NE, no effects.
